# Supplementary material for: Characteristics and outcomes of asthmatic patients with COVID-19 pneumonia who require hospitalisation
Source: PubMed Central journal article supplement — Eur Respir J. 2020 Nov 5;56(5):2001875. doi: 10.1183/13993003.01875-2020 (PMC7397950; doi:10.1183/13993003.01875-2020), 2020-11-05
Supplement: ERJ-01875-2020.SUPPLEMENT.pdf [file ERJ-01875-2020.SUPPLEMENT.pdf]

## SUPPLEMENTARY DATA

**Figure S1. Decision algorithm in Bicêtre Hospital, during the spring 2020 COVID-19 outbreak**

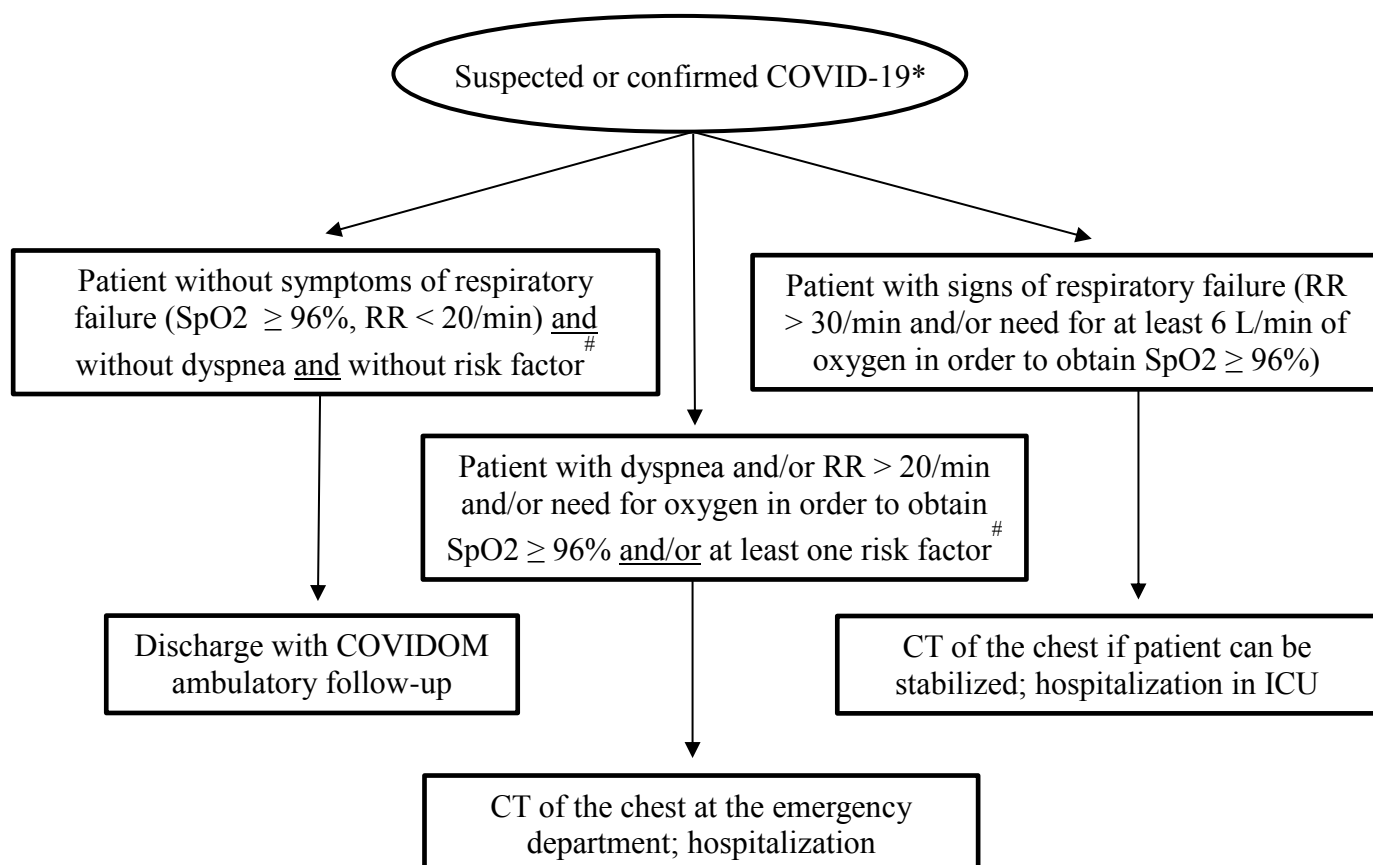

*COVIDOM is the French ambulatory follow-up health care program for patients with COVID-19; ICU: intensive care unit; SpO<sub>2</sub>: oxygen peripheral saturation while breathing room air; RR: respiratory rate; \*COVID-19 was highly suspected if symptoms and/or CT-scan were typical; diagnosis was confirmed by positive RT-PCR. #List of risk factors : age > 65 years; obesity; chronic respiratory failure; heart failure; renal failure; cirrhosis; diabetes; immunosuppression/cancer; pregnancy.*

**Figure S2. Pneumonia severity according to ICS doses**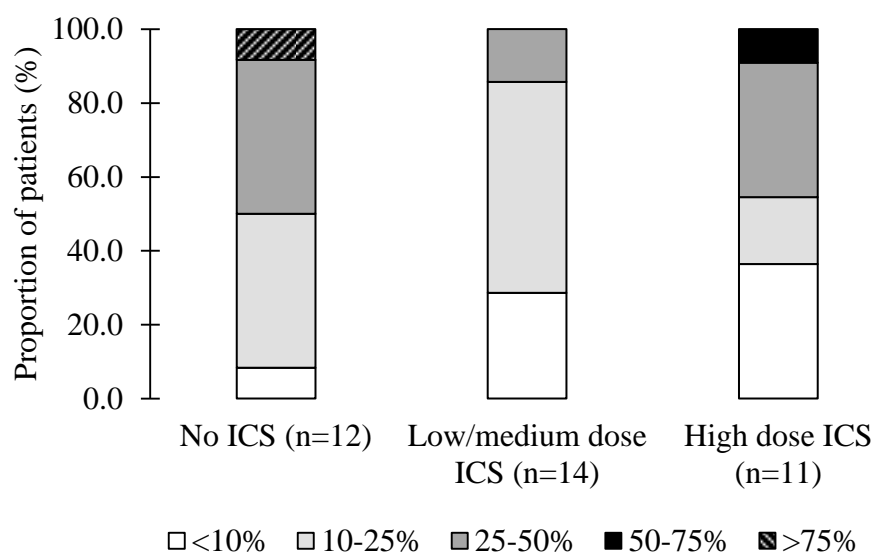

*ICS : inhaled corticosteroids*

**Table S1. Daily doses of asthma controller at admission**

|                                                           |         |
|-----------------------------------------------------------|---------|
| <b>SABA alone</b>                                         | 11 (30) |
| Salbutamol 100 µg p.r.n                                   | 9       |
| Terbutaline 500 mg p.r.n                                  | 2       |
| <b>LTRA (GINA 2)</b>                                      | 1 (2)   |
| Montelukast, 10 mg                                        | 1       |
| <b>Medium dose ICS (GINA 2)</b>                           | 1 (2)   |
| Non-extrafine particle beclometasone pMDI, 1000µg         | 1       |
| <b>Low-dose ICS/LABA (GINA 3)</b>                         | 5 (14)  |
| Fluticasone furoate/vilanterol DPI, 92/22 µg              | 1       |
| Budesonide/formoterol DPI, 400/12 µg                      | 4       |
| <b>Medium-dose ICS/LABA (GINA 4)</b>                      | 8 (22)  |
| Fluticasone proprionate/salmeterol                        | 3       |
| pMDI, 500/50 µg                                           | 1       |
| DPI, 500/100 µg                                           | 2       |
| Extrafine particle beclometasone/fomoterol                | 5       |
| pMDI, 400/24 µg                                           | 4       |
| Add-on montelukast, 10 mg                                 | 1       |
| DPI, 400/12 µg                                            | 1       |
| <b>High-dose ICS/LABA (GINA 5)</b>                        | 11 (30) |
| Fluticasone proprionate/salmeterol                        | 7       |
| DPI, 1000/100 µg                                          | 5       |
| Add-on tiotropium SMI, 5µg                                | 1       |
| DPI, 2000/200 µg                                          | 1       |
| pMDI, 1000/100 µg                                         | 1       |
| Extrafine particle beclometasone/fomoterol DPI, 800/24 µg | 1       |
| Budesonide/formoterol DPI, 1600/48 µg                     | 3       |
| Add-on omalizumab, 300 mg twice monthly                   | 2       |
| Add-on oral CS, 5 mg daily                                | 1       |

*CS: corticosteroids; DPI: dry powder inhaler; LTRA : leukotriene receptor antagonist; pMDI: pressurized metered-dose inhaler; SABA: short-acting bronchodilators.*
